# Supplementary material for: Selective coordination of cyanate and thiocyanate in the end-on mode: synthesis, structures and properties of [NiII2L(μ1,1-NCO)]+and [NiII2L(μ1,1-NCS)]+(L2−= macrocyclic N6S2ligand)
Source: Royal Society of Chemistry journal article supplement (doi:10.1039/c8nj00114f), 2018-01-01
Supplement: c8nj00114f1.pdf [file c8nj00114f1.pdf]

## Selective Coordination of Cyanate and Thiocyanate in the End-On Mode:

### Synthesis, Structures and Properties of $[\text{Ni}^{\text{II}}_2(\text{L})(\mu_{1,1}\text{-NCO})]^+$ and

### $[\text{Ni}^{\text{II}}_2(\text{L})(\mu_{1,1}\text{-NCS})]^+$ ( $\text{L}^{2-}$ = Macrocyclic $\text{N}_6\text{S}_2$ Ligand)

Alexander Jeremies, Sina Gruschinski, Sara Schmorl, Tobias Severin, and Berthold

Kersting

Prof. Dr. B. Kersting, Dr. A. Jeremies, Dr. S. Gruschinski, S. Schmorl, T. Severin

Institut für Anorganische Chemie, Universität Leipzig, Johannisallee 29, D-04103 Leipzig

(Germany)

Fax: +49/(0)341-97-36199

E-Mail: b.kersting@uni-leipzig.de

† Electronic supplementary information (ESI) available: MS and IR spectra for new compounds. Calculated coordinates for complexes **3** and **4**. Crystallographic data in CIF format for **3**. CCDC 1815491 contains the supplementary crystallographic data for this paper. These data can be obtained free of charge via [www.ccdc.cam.ac.uk/data\\_request/cif](http://www.ccdc.cam.ac.uk/data_request/cif). For ESI and or other electronic format see DOI: 10.1039/\_\_\_\_\_

**SUPPORTING INFORMATION**

1) Spectrophotometric titration of  $[\text{Ni}_2\text{L}][\text{ClO}_4]_2$  (**1**) with  $\text{N}(\text{n-Bu})_4\text{NO}_2$ .

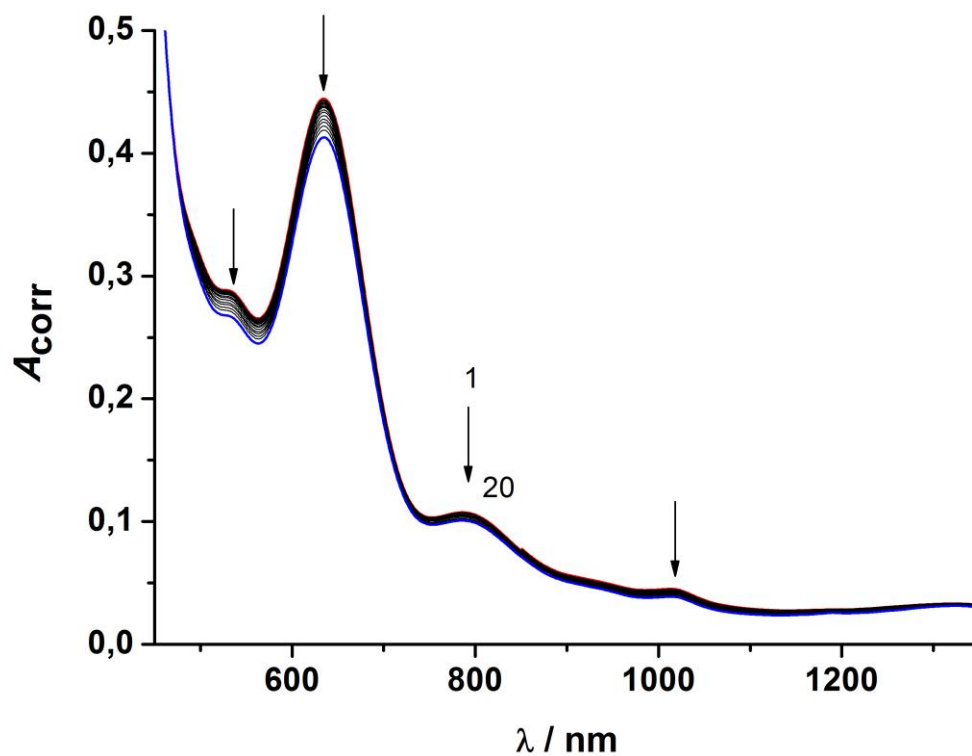

**Fig S1.** Spectrophotometric titration of  $[\text{Ni}_2\text{L}][\text{ClO}_4]_2$  (**1**) as a function of increasing amounts of  $\text{N}(\text{n-Bu})_4\text{NO}_2$  added in  $25 \mu\text{L}$  increments. Solvent: MeCN/MeOH (1/1 v/v),  $T = 298(1) \text{ K}$ . Left:  $[\mathbf{1}]_0 = 1.00 \cdot 10^{-3} \text{ M}$ ,  $[\text{N}(\text{n-Bu})_4\text{NO}_2] = 6.94 \cdot 10^{-3} \text{ M}$  (spectra 1–11: 0–1.0 equiv.),  $\text{N}(\text{n-Bu})_4\text{NO}_2 = 6.94 \cdot 10^{-2} \text{ M}$  (spectra 12–20: 2–9.8 equiv.),  $I = 0.1 \text{ M N}(\text{n-Bu})_4\text{ClO}_4$ .

## 2) ESI-MS spectra for Complex 3.

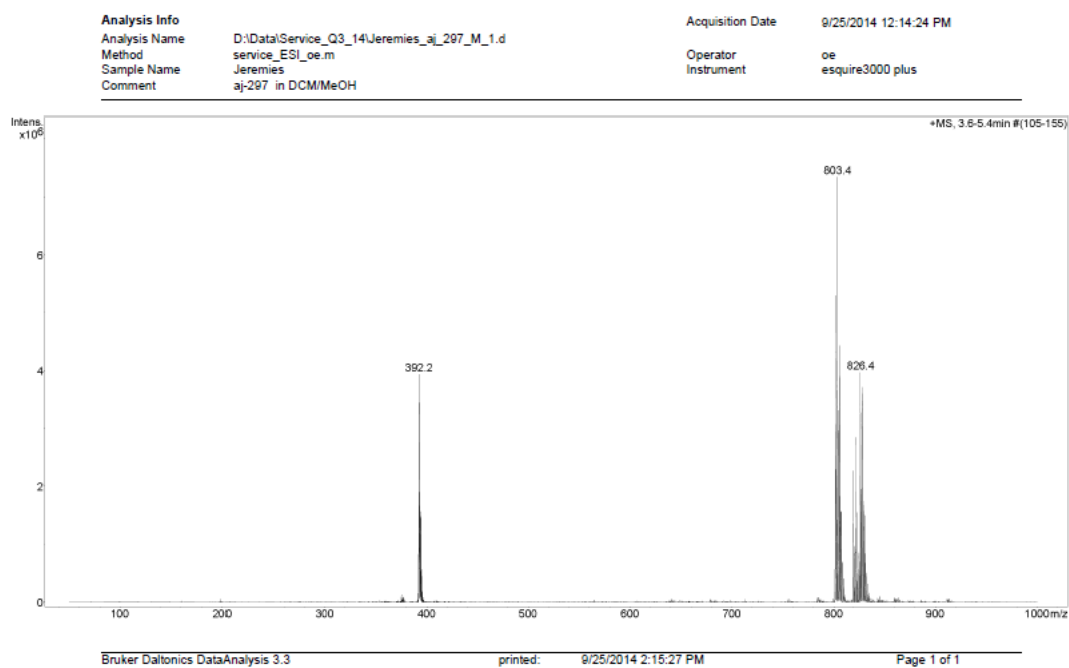

**Fig. S2.**  $m/z$  (ESI+, CH<sub>2</sub>Cl<sub>2</sub>/MeOH): C<sub>63</sub>H<sub>84</sub>BN<sub>7</sub>Ni<sub>2</sub>OS<sub>2</sub> (1147.72) [Ni<sub>2</sub>L(OCN)-BPh<sub>4</sub>]<sup>+</sup> calcd.: 826.33; found 826.4.

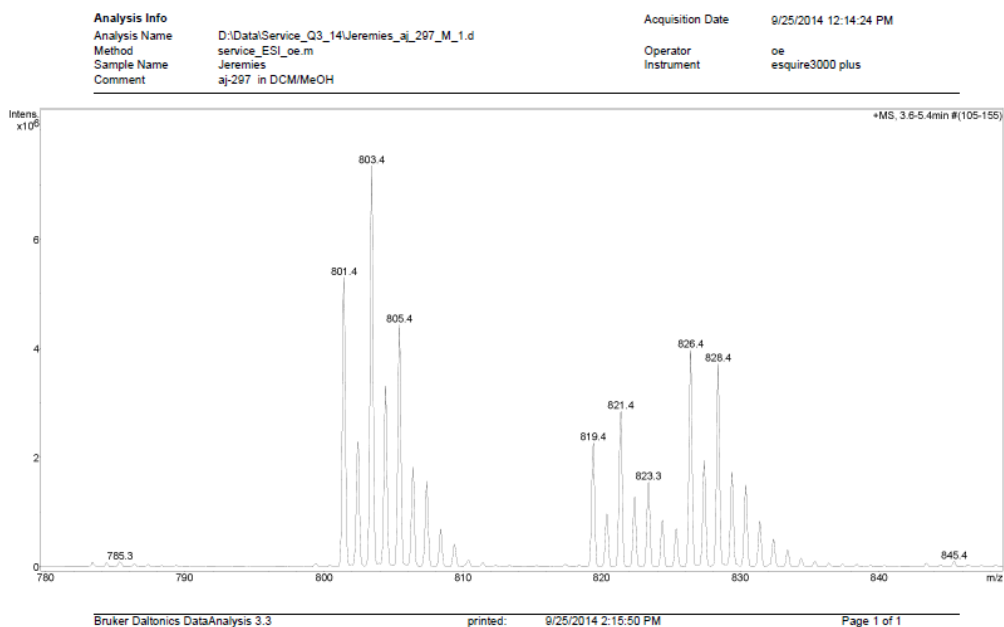

**Fig. S3.**  $m/z$  (ESI+, CH<sub>2</sub>Cl<sub>2</sub>/MeOH): C<sub>63</sub>H<sub>84</sub>BN<sub>7</sub>Ni<sub>2</sub>OS<sub>2</sub> (1147.72) [Ni<sub>2</sub>L(OCN)-BPh<sub>4</sub>]<sup>+</sup> calcd.: 826.33; found 826.4.

### 3) Infrared spectroscopy.

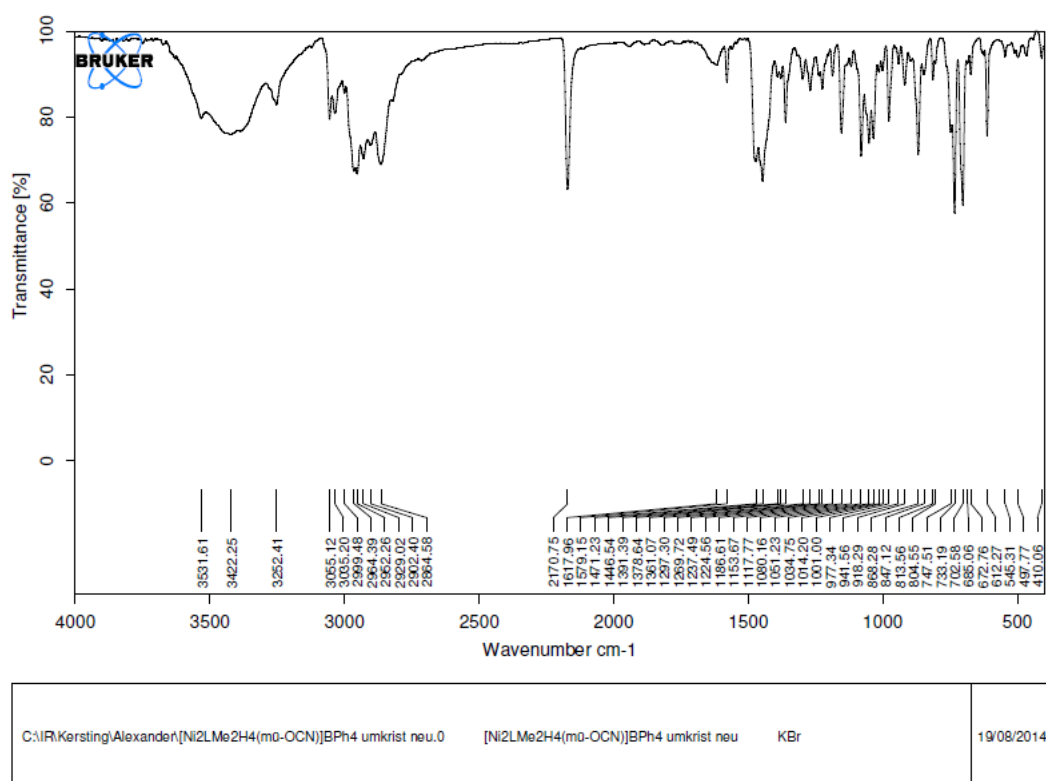

Fig. S4. Infrared spectrum of 3.

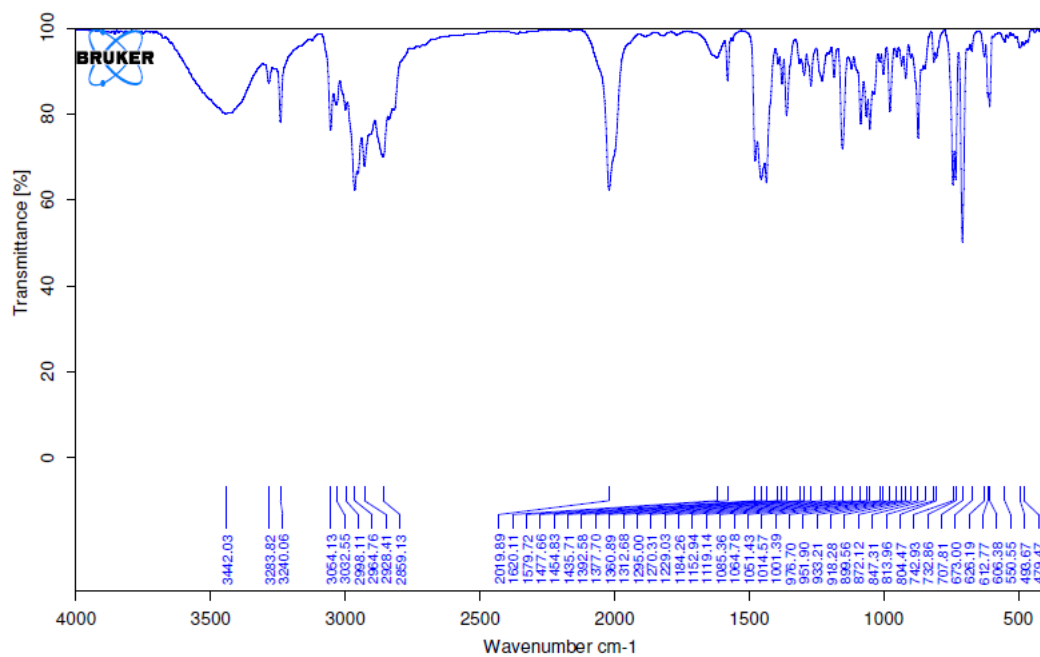

Fig. S5. Infrared spectrum of 4.

**Table S1.** Cartesian Coordinates of  $[\text{Ni}_2\text{L}(\mu_{1,1}\text{-NCO})]^+$  (PBE0, RIJONX, TZV(P), TZV/J, ZORA).

|    |                   |                   |                   |
|----|-------------------|-------------------|-------------------|
| Ni | 0.02615878920445  | 0.04461848470771  | 0.12866853685897  |
| Ni | -0.04392443522105 | 3.19845215481705  | 0.13904978799377  |
| S  | 0.06600643816248  | 1.63042535447890  | -1.74638106323756 |
| S  | 1.70421806684405  | 1.64939110508339  | 1.00245746463946  |
| N  | 1.45080164099838  | 4.49660758295575  | -0.46690849440496 |
| N  | -0.44971152363412 | 4.62748069748973  | 1.87605428495873  |
| N  | -1.56986758043167 | 4.19574193216995  | -0.81914207894918 |
| N  | -0.32196731706976 | -1.40167264584645 | 1.85775898858333  |
| N  | -1.46341466522153 | -1.00344206252314 | -0.83363518728572 |
| N  | 1.56869964237265  | -1.18773546744209 | -0.49466348296774 |
| C  | 2.84352634228018  | 1.68202371634106  | -0.36330762244990 |
| C  | 3.27492515605195  | 2.90131979808531  | -0.89392449291996 |
| C  | 4.13634689758404  | 2.91818382473896  | -1.98435339033940 |
| H  | 4.45963649938357  | 3.87152972435689  | -2.38891809945498 |
| C  | 4.59117758591957  | 1.73697544857118  | -2.54883513749689 |
| C  | 4.18422778957388  | 0.52854738879775  | -2.00568587299575 |
| H  | 4.54590080019413  | -0.40348607597173 | -2.42703526941810 |
| C  | 3.32329762868400  | 0.49051098162899  | -0.91516933482031 |
| C  | 2.84974252242948  | 4.19427487296087  | -0.27625051256713 |
| H  | 3.03382170741802  | 4.14916232802734  | 0.80740890068082  |
| H  | 3.46866949678210  | 5.00910751454041  | -0.66185026520747 |
| C  | 1.19936673388706  | 5.90803832718709  | -0.43283312500694 |
| H  | 0.23242376494463  | 6.11456360523497  | -0.89619993227267 |
| H  | 1.97416652833546  | 6.44563099075357  | -0.98793698589976 |
| C  | 1.17150044517929  | 6.40256525962499  | 1.01868326720136  |
| H  | 2.04462327215861  | 6.04061155944959  | 1.56651737230196  |
| H  | 1.25024741695916  | 7.49221660562734  | 1.00265026426727  |
| C  | -0.12924103873139 | 6.06203426971498  | 1.70208876061545  |
| H  | -0.91934183032740 | 6.51389224688610  | 1.10667899447280  |
| H  | -0.16616048160949 | 6.54179310484450  | 2.68903438099148  |
| C  | 0.31051855520153  | 4.10187967874781  | 3.01555655721449  |
| H  | 0.09394845267889  | 4.67263630392066  | 3.92751426201544  |
| H  | 1.37898259768361  | 4.14954508797592  | 2.81300842582654  |
| H  | 0.04473947618767  | 3.05869275341772  | 3.18047787489916  |
| C  | -1.88851676648518 | 4.54785347113405  | 2.22023146327665  |
| H  | -2.06238400548318 | 5.15919003170904  | 3.11713414257135  |
| H  | -2.09865539600316 | 3.52255205891997  | 2.51334009995847  |
| C  | -2.86498857362783 | 5.01835371512572  | 1.15377489692142  |
| H  | -2.76936682767586 | 6.09403626973475  | 0.99771459369962  |
| H  | -3.86567020162130 | 4.88246559251336  | 1.57417579439709  |
| C  | -2.86217260791583 | 4.33105052213759  | -0.20473717350230 |
| H  | -3.29054186447817 | 3.32278774761959  | -0.12056345849689 |
| H  | -3.54514240441847 | 4.86885885564339  | -0.87210513817378 |
| C  | -1.62672368908676 | 4.10436052436807  | -2.26516520352699 |
| H  | -2.21954592091875 | 4.93656021182377  | -2.65676234048222 |
| H  | -0.60757521469705 | 4.18231961471748  | -2.64965753617145 |
| C  | -2.24702187081663 | 2.79638338213873  | -2.69704941968752 |
| C  | -1.57651718429130 | 1.59943327051946  | -2.40811412232434 |
| C  | -2.19886547423367 | 0.37827276811981  | -2.70327316522502 |
| C  | -3.44380218342531 | 0.36611640721180  | -3.32137413129381 |
| H  | -3.91825853973537 | -0.58338515984987 | -3.54516493962263 |
| C  | -4.08461277024666 | 1.55260908884473  | -3.64721940427535 |
| C  | -3.49155260658147 | 2.76208033840922  | -3.31510076887958 |
| H  | -4.00371404840492 | 3.69305062893235  | -3.53366267825230 |

|   |                   |                   |                   |
|---|-------------------|-------------------|-------------------|
| C | -1.52623655554379 | -0.90607418567597 | -2.27914285164862 |
| H | -0.50540118447407 | -0.94137148223484 | -2.66542549041479 |
| H | -2.08634932477012 | -1.75884123868263 | -2.67451959471154 |
| C | -2.74786295571209 | -1.19488025509409 | -0.21771067170106 |
| H | -3.40826292007563 | -1.75870511172375 | -0.88650017950805 |
| H | -3.21965001920035 | -0.20659899824547 | -0.12907245034476 |
| C | -2.72035977205468 | -1.88747168465181 | 1.13794387702398  |
| H | -2.57995816368585 | -2.95756907043996 | 0.97702938795493  |
| H | -3.72516813106928 | -1.79532124157436 | 1.56016788452132  |
| C | -1.76228423206632 | -1.38188670050295 | 2.20483044674899  |
| H | -2.01290430651232 | -0.36720463237918 | 2.50268930057890  |
| H | -1.90864922433144 | -2.00411422319514 | 3.09901314146944  |
| C | 0.41797875846581  | -0.85320004078021 | 3.00012803090473  |
| H | 0.22308429015232  | -1.43686291497968 | 3.90876596030971  |
| H | 0.11248256960820  | 0.17810005935577  | 3.17040032905856  |
| H | 1.48722165328280  | -0.85904304031297 | 2.79688788943592  |
| C | 0.05537519170070  | -2.82141715351301 | 1.67582022584867  |
| H | -0.71589220987600 | -3.30086375701490 | 1.07725157990523  |
| H | 0.03736586856562  | -3.30746184810683 | 2.66013191700901  |
| C | 1.36874431894956  | -3.10514944981090 | 0.99070196744288  |
| H | 2.22646752253452  | -2.70799252216841 | 1.53809788306177  |
| H | 1.49310770876489  | -4.19050897981715 | 0.97237857304723  |
| C | 1.37468363502104  | -2.60820667990419 | -0.46027985224990 |
| H | 2.16900011862566  | -3.11438640144920 | -1.01728366125197 |
| H | 0.41563863880273  | -2.85280363206456 | -0.92160518650463 |
| C | 2.95633891462886  | -0.83045053896099 | -0.31954958131915 |
| H | 3.60081479190212  | -1.61193624082410 | -0.73137078656685 |
| H | 3.15771972364580  | -0.80166519860223 | 0.76184052523928  |
| H | 5.26375427164790  | 1.75812792552894  | -3.39843630685758 |
| H | -5.05167258796237 | 1.53458356678772  | -4.13525409488228 |
| N | -1.27760613828362 | 1.59664765104835  | 0.93448044497599  |
| C | -2.41024044515925 | 1.57262829250318  | 1.30847993633339  |
| O | -3.53658703022693 | 1.54738393635941  | 1.68791212035423  |

**Table S2.** Cartesian Coordinates of  $[\text{Ni}_2\text{L}(\mu_{1,1}\text{-OCN})]^+$  (PBE0, RIJONX, TZV(P), TZV/J, ZORA).

|    |                   |                   |                   |
|----|-------------------|-------------------|-------------------|
| Ni | 0.02409404729081  | -0.03791260828705 | 0.14119311259415  |
| Ni | -0.03795217158663 | 3.29352702181177  | 0.14672829927000  |
| S  | -0.05070091410070 | 1.63342764058988  | -1.61251407122760 |
| S  | 1.59961137625041  | 1.65608910515205  | 1.05372381825769  |
| N  | 1.47639247149162  | 4.50954505020480  | -0.47468141826955 |
| N  | -0.40441838922916 | 4.72552173521843  | 1.79868959548566  |
| N  | -1.60082881283689 | 4.21224415330140  | -0.79295417278066 |
| N  | -0.28379204601716 | -1.50327224181316 | 1.78281240010693  |
| N  | -1.49845393577925 | -1.01379357946366 | -0.80987871956626 |
| N  | 1.58443532834593  | -1.18924938318057 | -0.49576697621048 |
| C  | 2.82532939653195  | 1.68535373655891  | -0.24042180628646 |
| C  | 3.30544546724915  | 2.90153658596443  | -0.73814948514958 |
| C  | 4.24525225289516  | 2.91383771959727  | -1.76183562244012 |
| H  | 4.60171027250071  | 3.86597324842229  | -2.14003840567500 |
| C  | 4.73687979666033  | 1.73151870287097  | -2.29059403419112 |
| C  | 4.28955917697788  | 0.52634919184579  | -1.77410140488892 |
| H  | 4.68150133297016  | -0.40782858349426 | -2.16189985548164 |
| C  | 3.35006905445366  | 0.49291875907611  | -0.75046317797337 |
| C  | 2.85017075814335  | 4.20263580607812  | -0.15700197197646 |

|   |                   |                   |                   |
|---|-------------------|-------------------|-------------------|
| H | 2.93753760540358  | 4.15146736631553  | 0.93827877492120  |
| H | 3.51043339195659  | 5.00877404538229  | -0.48701018365971 |
| C | 1.23712534419743  | 5.91630409711131  | -0.59898185394362 |
| H | 0.31180415280866  | 6.08142681309662  | -1.15330828143127 |
| H | 2.06042761402413  | 6.39914199209361  | -1.13364851409206 |
| C | 1.09826395198863  | 6.53466092439606  | 0.79752013713238  |
| H | 1.97059871599090  | 6.29934754415911  | 1.41125810008475  |
| H | 1.08995923737513  | 7.62049395710053  | 0.67716910950474  |
| C | -0.20439849902959 | 6.15163763555862  | 1.45620867097141  |
| H | -0.99815604467965 | 6.44044792363229  | 0.77133026715922  |
| H | -0.34370221465172 | 6.74188121592571  | 2.37111161877767  |
| C | 0.44554570422240  | 4.36616539875825  | 2.93957774173721  |
| H | 0.25483900900491  | 5.02923182042067  | 3.79179862942682  |
| H | 1.49764464585416  | 4.43251712370558  | 2.67114362680968  |
| H | 0.23962513667726  | 3.33967758386679  | 3.23780162054442  |
| C | -1.81577796746067 | 4.57968843086699  | 2.23402515526539  |
| H | -1.96610355929731 | 5.20838387744985  | 3.12174675321466  |
| H | -1.95265005735206 | 3.55222240532159  | 2.56146663558995  |
| C | -2.87814999996984 | 4.96403763759042  | 1.21656398278733  |
| H | -2.88110275676331 | 6.04325242409320  | 1.05633810199855  |
| H | -3.84017692249086 | 4.74098268365253  | 1.68584321031850  |
| C | -2.87685237777714 | 4.26416110154780  | -0.13526715439064 |
| H | -3.22464549456305 | 3.22754999911309  | -0.01294126593930 |
| H | -3.62172085091180 | 4.73752620168391  | -0.78449999071325 |
| C | -1.69748294929830 | 4.10941356189975  | -2.23554903419021 |
| H | -2.30562849528094 | 4.93888661663786  | -2.60960782879814 |
| H | -0.69198338700183 | 4.19893992737128  | -2.65258977883398 |
| C | -2.31984043090208 | 2.80071170157606  | -2.66048629844970 |
| C | -1.66671462650788 | 1.60274853332243  | -2.34367137793002 |
| C | -2.27008515136379 | 0.38081449745589  | -2.66779552633710 |
| C | -3.49209047309584 | 0.36950741640314  | -3.32951719677233 |
| H | -3.95559216593090 | -0.57988644132252 | -3.57503235418881 |
| C | -4.12329967318554 | 1.55631875572856  | -3.67193805074741 |
| C | -3.54116080346009 | 2.76604655495863  | -3.32244920372642 |
| H | -4.04321692938613 | 3.69717908237387  | -3.56208026149656 |
| C | -1.59475557242221 | -0.90453291672711 | -2.25208117340775 |
| H | -0.58517773163607 | -0.94841177357812 | -2.66643631505103 |
| H | -2.16715495411014 | -1.75498729945461 | -2.63491038508313 |
| C | -2.77166800120009 | -1.13472618796815 | -0.15627625155355 |
| H | -3.49350440674956 | -1.63224540312263 | -0.81339676684621 |
| H | -3.16628149227875 | -0.11725578701597 | -0.01778751722429 |
| C | -2.74115367656370 | -1.85312262968910 | 1.18543110374671  |
| H | -2.68998009840177 | -2.92863028351649 | 1.00963488532650  |
| H | -3.71452035252093 | -1.68553018287836 | 1.65453894147342  |
| C | -1.70259756256899 | -1.43016523608901 | 2.21214998586578  |
| H | -1.89089056323726 | -0.41492263136449 | 2.55146559717338  |
| H | -1.82599801498634 | -2.07608954466207 | 3.09178718323829  |
| C | 0.54297678932504  | -1.10501933249452 | 2.92818297322812  |
| H | 0.37877873573264  | -1.77622438759167 | 3.77971778745449  |
| H | 0.28886254601791  | -0.08919642185431 | 3.22550350361202  |
| H | 1.59832465256716  | -1.12268251972067 | 2.66455095392266  |
| C | -0.01170393856907 | -2.91782964930352 | 1.44131549791178  |
| H | -0.79337786554295 | -3.25104727555632 | 0.76265240130068  |
| H | -0.11463047823398 | -3.51201698525496 | 2.35834123231110  |
| C | 1.30451871482655  | -3.23281814018127 | 0.77458736703213  |
| H | 2.16699410594100  | -2.95529615828796 | 1.38478755035864  |
| H | 1.35130360243140  | -4.31739437382266 | 0.65166100443330  |

|   |                   |                   |                   |
|---|-------------------|-------------------|-------------------|
| C | 1.40262218343728  | -2.60470828943714 | -0.62101746032605 |
| H | 2.23984775963713  | -3.05068341340963 | -1.16605367224006 |
| H | 0.47927950069648  | -2.80696112937460 | -1.16645721311255 |
| C | 2.94637834665909  | -0.83045810968777 | -0.18177004022757 |
| H | 3.63624053473669  | -1.60689747301314 | -0.52218605260575 |
| H | 3.03660507053577  | -0.78805034414187 | 0.91357838387596  |
| H | 5.47128058025337  | 1.74919840577600  | -3.08730166045188 |
| H | -5.07442188492936 | 1.53826070649865  | -4.19022873462038 |
| O | -1.34766929541761 | 1.58493292502230  | 1.14383801032456  |
| C | -2.51203808860208 | 1.56029433483162  | 1.54475974632205  |
| N | -3.62095628618148 | 1.53768503736870  | 1.92756504963812  |

**Table S3.** Cartesian Coordinates of  $[\text{Ni}_2\text{L}(\mu_{1,1}\text{-NCS})]^+$  (PBE0, RIJONX, TZV(P), TZV/J, ZORA).

|    |                   |                   |                   |
|----|-------------------|-------------------|-------------------|
| Ni | 0.02778612928015  | 0.02220142616632  | 0.14148903957112  |
| Ni | -0.00958318893918 | 3.23415948352166  | -0.18245432140700 |
| S  | -0.25115221795760 | 1.44758360756474  | -1.82434054056157 |
| S  | 1.78097362532918  | 1.71792229444160  | 0.61221441123522  |
| N  | 1.39156182232513  | 4.37378071061936  | -1.17356335823456 |
| N  | -0.08448274953147 | 4.90620029136278  | 1.34966540859315  |
| N  | -1.67625815145581 | 4.12967596285282  | -0.96924437205705 |
| N  | -0.02745268664418 | -1.31397459780431 | 1.96613091303310  |
| N  | -1.61351272043038 | -1.04838294558743 | -0.46582051485600 |
| N  | 1.46945727433853  | -1.25093872919377 | -0.60362832215123 |
| C  | 2.77695707392546  | 1.58249091726558  | -0.85680582595712 |
| C  | 3.16682978706183  | 2.72779587098275  | -1.55789369491816 |
| C  | 3.92959572368879  | 2.61059493293370  | -2.71381907880181 |
| H  | 4.22031999479291  | 3.50811603468823  | -3.24926716903275 |
| C  | 4.32867355402056  | 1.36753652218398  | -3.17878509132440 |
| C  | 3.96389430089328  | 0.23376407729382  | -2.47045130536823 |
| H  | 4.28235349403188  | -0.74483240431774 | -2.81393663674032 |
| C  | 3.20116705422713  | 0.33095259689719  | -1.31261180489313 |
| C  | 2.80245646569809  | 4.08844121172536  | -1.05716177182019 |
| H  | 3.06938077128175  | 4.15769982890469  | 0.00754706226461  |
| H  | 3.39228514993337  | 4.84756893952176  | -1.57731404968469 |
| C  | 1.13932316220884  | 5.76813646373304  | -1.38777315273852 |
| H  | 0.12094867045305  | 5.90501352188479  | -1.75524638841668 |
| H  | 1.83686555760306  | 6.17059339117865  | -2.12900264183533 |
| C  | 1.29909867723744  | 6.52810145396096  | -0.06636760039990 |
| H  | 2.26495212120265  | 6.30519220709270  | 0.39243727445904  |
| H  | 1.30919748430715  | 7.59633021194387  | -0.29541131897911 |
| C  | 0.13500029114519  | 6.28664502369680  | 0.86234398079393  |
| H  | -0.75830208759289 | 6.59635316464678  | 0.32542040880395  |
| H  | 0.22034512913084  | 6.94451391771364  | 1.73763150199568  |
| C  | 0.89971616383722  | 4.59771766122962  | 2.39264280711424  |
| H  | 0.83949920594031  | 5.32398802138804  | 3.21280682242244  |
| H  | 1.90830740247086  | 4.61224810372145  | 1.98445708785070  |
| H  | 0.71310320289137  | 3.60125520316687  | 2.78977185970240  |
| C  | -1.42433402552635 | 4.88742992290485  | 1.98413111862380  |
| H  | -1.42757226610245 | 5.62114049690563  | 2.80259486634192  |
| H  | -1.55144756919042 | 3.91403490638950  | 2.44961830903592  |
| C  | -2.60552297330542 | 5.20882010769054  | 1.08137329472725  |
| H  | -2.58545377391164 | 6.25777569933323  | 0.78258865834627  |
| H  | -3.49850538636430 | 5.10746388290391  | 1.70407904728029  |
| C  | -2.83782169602836 | 4.35348181262370  | -0.15650873020822 |



|   |                   |                   |                   |
|---|-------------------|-------------------|-------------------|
| H | -3.21852846543528 | 3.36626773729160  | 0.14282488209620  |
| H | -3.64087169292639 | 4.80090029739164  | -0.75313518692914 |
| C | -1.97802826483931 | 3.89418658683938  | -2.36718393987343 |
| H | -2.62534369898450 | 4.69538277512803  | -2.73643423945520 |
| H | -1.03971690244213 | 3.91230882493210  | -2.92477957544742 |
| C | -2.66757269969691 | 2.56299540471850  | -2.55615959754129 |
| C | -1.97319320522211 | 1.38685067205878  | -2.24342556559660 |
| C | -2.63732555440514 | 0.15591647969699  | -2.32386887165818 |
| C | -3.95789495408312 | 0.10792184215127  | -2.75460707568991 |
| H | -4.46444937324304 | -0.84947076214517 | -2.81215134666668 |
| C | -4.63088708336925 | 1.26990329024749  | -3.10313216287716 |
| C | -3.98781449742967 | 2.49347878083212  | -2.98475459008479 |
| H | -4.51898540361879 | 3.40849825362283  | -3.22371066322294 |
| C | -1.91548020611444 | -1.09533261453299 | -1.88265036616264 |
| H | -0.97526853526115 | -1.19609944077844 | -2.42870303462349 |
| H | -2.54158371402351 | -1.96870606007841 | -2.08902655336321 |
| C | -2.77567587306117 | -1.13148785204725 | 0.37365223085406  |
| H | -3.56892321847632 | -1.69993408916596 | -0.12397399573529 |
| H | -3.17357417625088 | -0.11162172645254 | 0.47545642677962  |
| C | -2.53693630210522 | -1.72641899430203 | 1.75515035937201  |
| H | -2.48998708265871 | -2.81254061471618 | 1.66462182747999  |
| H | -3.43815110739997 | -1.52814658379030 | 2.34199800212788  |
| C | -1.37180112711712 | -1.20743111272588 | 2.58265648306500  |
| H | -1.52744920546065 | -0.16605277003963 | 2.84961259926267  |
| H | -1.36055525571056 | -1.76914108124840 | 3.52695169572777  |
| C | 0.94275802628851  | -0.78171410154292 | 2.92881212265524  |
| H | 0.90596723615524  | -1.34150773896288 | 3.87130956859933  |
| H | 0.71952396822903  | 0.26468152334773  | 3.13115531979476  |
| H | 1.95146810790391  | -0.83662946134643 | 2.52481048402938  |
| C | 0.22694074592844  | -2.75755170947876 | 1.75555023107989  |
| H | -0.64943540993712 | -3.18085437416275 | 1.27161592264996  |
| H | 0.30584047862413  | -3.23447641206493 | 2.74132439191664  |
| C | 1.41328694277344  | -3.14281893505915 | 0.90687143075348  |
| H | 2.36221003628153  | -2.79736854437790 | 1.32257971428532  |
| H | 1.46007475607576  | -4.23431502360494 | 0.89724523711922  |
| C | 1.25558092795553  | -2.66621576122420 | -0.54145085509827 |
| H | 1.97485888246535  | -3.18871576800818 | -1.17956017174122 |
| H | 0.24720134075685  | -2.90008291421949 | -0.88694453488439 |
| C | 2.87233663301125  | -0.91077297524058 | -0.54818231492198 |
| H | 3.48328654598011  | -1.74159075488675 | -0.90983327721445 |
| H | 3.13939674205882  | -0.75996371635148 | 0.50839101512229  |
| H | 4.92585401382884  | 1.28379242010001  | -4.07906777783726 |
| H | -5.65823846436138 | 1.22429174032123  | -3.44376342673201 |
| N | -1.17618888101555 | 1.71538241176921  | 1.06356890554335  |
| C | -2.17969273543438 | 1.77193852702714  | 1.68640104531886  |
| S | -3.56077009050852 | 1.84676311894682  | 2.52837304591497  |

**Table S4.** Cartesian Coordinates of  $[\text{Ni}_2\text{L}(\mu_{1,1}\text{-SCN})]^+$  (PBE0, RIJONX, TZV(P), TZV/J, ZORA).

|    |                   |                   |                   |
|----|-------------------|-------------------|-------------------|
| Ni | 0.01517911265383  | -0.09740324834604 | 0.23415423770658  |
| Ni | -0.02401480564323 | 3.36751261072049  | -0.11160372373685 |
| S  | -0.31228345862685 | 1.47181596407415  | -1.61134027969435 |
| S  | 1.77749724151794  | 1.71644655896207  | 0.70965080761267  |

|   |                   |                   |                   |
|---|-------------------|-------------------|-------------------|
| N | 1.41546597521877  | 4.39718821702601  | -1.12758580669578 |
| N | -0.10074947163288 | 5.11898722379561  | 1.29800169211403  |
| N | -1.69209679626582 | 4.19636629609446  | -0.93374937552509 |
| N | -0.03446251073439 | -1.52897159585922 | 1.95840631555063  |
| N | -1.63115556995843 | -1.10375160909001 | -0.42484843737303 |
| N | 1.46661124896637  | -1.27567199121724 | -0.58171483830169 |
| C | 2.76522304457234  | 1.58378495948867  | -0.76419331927316 |
| C | 3.16999480730337  | 2.73285879662404  | -1.45233302038468 |
| C | 3.93440364893490  | 2.62137057717973  | -2.60756138669365 |
| H | 4.23530722833042  | 3.52206102911959  | -3.13186147189001 |
| C | 4.32480556177798  | 1.38011129076266  | -3.08403911898266 |
| C | 3.95288262912297  | 0.24300377551574  | -2.38521797429696 |
| H | 4.26921444043139  | -0.73421330863808 | -2.73438881344433 |
| C | 3.18861347946116  | 0.33381798702024  | -1.22781467319238 |
| C | 2.81488811546987  | 4.09321467376997  | -0.93913193929740 |
| H | 3.02770670552457  | 4.13007323292189  | 0.13849588511125  |
| H | 3.44437826956250  | 4.84826362104604  | -1.41598583866855 |
| C | 1.18948901500781  | 5.76479175470410  | -1.48705048329627 |
| H | 0.19647334179009  | 5.87307052657547  | -1.92562160508156 |
| H | 1.93389184629674  | 6.09666909990909  | -2.21691570314878 |
| C | 1.27975363745532  | 6.63665694175638  | -0.22914070330241 |
| H | 2.23072067001968  | 6.47599409704070  | 0.28340122727669  |
| H | 1.27727353679375  | 7.68083750648529  | -0.55068949192028 |
| C | 0.08605175937329  | 6.44797945676652  | 0.67463183233214  |
| H | -0.79594473343822 | 6.65872934659648  | 0.07443977461691  |
| H | 0.11205610162658  | 7.19779520236031  | 1.47687189154925  |
| C | 0.90596290866335  | 4.91786662878544  | 2.34602294289693  |
| H | 0.86059465301369  | 5.72215780563416  | 3.09102317281059  |
| H | 1.90604377662708  | 4.89588586994264  | 1.91807406316902  |
| H | 0.73006337806942  | 3.96557525330669  | 2.84386307932500  |
| C | -1.43183871205896 | 5.13898936753344  | 1.95661777182948  |
| H | -1.42633716007233 | 5.93577423075366  | 2.71310827196529  |
| H | -1.53938858121921 | 4.20035312827001  | 2.49523070469845  |
| C | -2.62897603564660 | 5.37441031469042  | 1.04876121845267  |
| H | -2.62815745078754 | 6.39663078347805  | 0.66802173424739  |
| H | -3.51424748441741 | 5.30907618922848  | 1.68718595873763  |
| C | -2.85133749499782 | 4.41718964335859  | -0.11408106660077 |
| H | -3.16599916230088 | 3.43672829949942  | 0.26891218545677  |
| H | -3.69008198292217 | 4.77661554129871  | -0.72033146615131 |
| C | -1.99727771748715 | 3.90874537777052  | -2.31904478746325 |
| H | -2.64181977746728 | 4.70054170906051  | -2.71301568507938 |
| H | -1.06166647960029 | 3.90652293873225  | -2.88161006954717 |
| C | -2.69133005199219 | 2.57640230382957  | -2.47390418407485 |
| C | -2.00926018964726 | 1.40380902133082  | -2.12112412582716 |
| C | -2.65978825244462 | 0.16851236514902  | -2.24542689200071 |
| C | -3.96485094308877 | 0.11748326206660  | -2.72033570558840 |
| H | -4.46097780346324 | -0.84288345199307 | -2.80927579835401 |
| C | -4.63368339074184 | 1.27799846444639  | -3.08022565209440 |
| C | -3.99600188770566 | 2.50244531711950  | -2.94628563882312 |
| H | -4.51740689618879 | 3.41539693894093  | -3.21284501626710 |
| C | -1.93245629968396 | -1.09121123404436 | -1.84062034889333 |
| H | -0.99202960863706 | -1.16861724205327 | -2.39062292971663 |
| H | -2.55286534628925 | -1.96029960547537 | -2.08052448710179 |
| C | -2.79093741169433 | -1.20047368101195 | 0.41728101554507  |
| H | -3.61144016871204 | -1.69655136835073 | -0.11172367072875 |
| H | -3.14318777728629 | -0.17616722992287 | 0.60285520643027  |
| C | -2.55207152326325 | -1.90859035479520 | 1.74350961380574  |

|   |                   |                   |                   |
|---|-------------------|-------------------|-------------------|
| H | -2.51515606233561 | -2.98451987299509 | 1.56649230280084  |
| H | -3.44696550553576 | -1.75100630073742 | 2.35202873878512  |
| C | -1.37532167957339 | -1.45831046721225 | 2.59430344906411  |
| H | -1.52023295161155 | -0.43339534831345 | 2.92679923801368  |
| H | -1.35695517161846 | -2.08152837337381 | 3.49824381252437  |
| C | 0.94844943913557  | -1.07726807124614 | 2.95086364832032  |
| H | 0.91699313603290  | -1.70852074925254 | 3.84691616162801  |
| H | 0.73323973225258  | -0.04886031719932 | 3.23530559754954  |
| H | 1.95355158083047  | -1.10977631252054 | 2.53513654639296  |
| C | 0.20911390411929  | -2.95303692336131 | 1.63421186170981  |
| H | -0.66632373888805 | -3.32893694729571 | 1.11034143682478  |
| H | 0.27701636751334  | -3.50853137830684 | 2.57841429838014  |
| C | 1.40360884562921  | -3.27784922054460 | 0.77061606477872  |
| H | 2.34995452457467  | -2.96910416890161 | 1.22018686790310  |
| H | 1.44638128240555  | -4.36543484946087 | 0.67738439939084  |
| C | 1.26617744740378  | -2.69266043197296 | -0.63961349726299 |
| H | 2.00381551910700  | -3.15574065412461 | -1.30217379948679 |
| H | 0.26705074086253  | -2.90919383838114 | -1.02079797471088 |
| C | 2.86094531132181  | -0.91566146353865 | -0.47313524979489 |
| H | 3.50037890851229  | -1.73332225451739 | -0.81395398015109 |
| H | 3.08455661886428  | -0.75683799331475 | 0.59180837675764  |
| H | 4.92406468168277  | 1.30030611050455  | -3.98318567256221 |
| H | -5.64939206088458 | 1.22940484893612  | -3.45340601850348 |
| S | -1.04125289874237 | 1.78516375101623  | 1.67078233635928  |
| C | -2.68288278270696 | 1.79224204014215  | 1.99677512930066  |
| N | -3.81892838582050 | 1.79916360622776  | 2.24966085125994  |

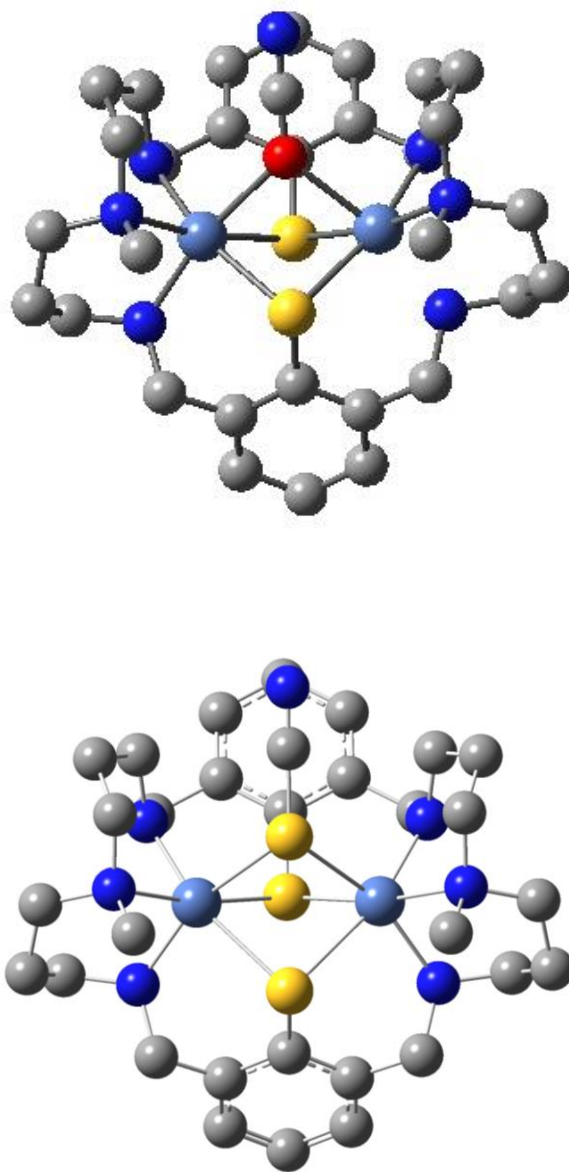

**Fig. S6.** Calculated structures of  $[\text{Ni}_2\text{L}(\mu_{1,1}\text{-NCO})]^+$  (top) and  $[\text{Ni}_2\text{L}(\mu_{1,1}\text{-SCN})]^+$  (bottom).

Hydrogen atoms are omitted for clarity.
